# Supplementary material
Source: PubMed Central journal article supplement (PMC3725055)
Supplement: 1301918110_pnas.201301918SI.pdf [file 1301918110_pnas.201301918SI.pdf]

# Supporting Information

Vaysburd et al. 10.1073/pnas.1301918110

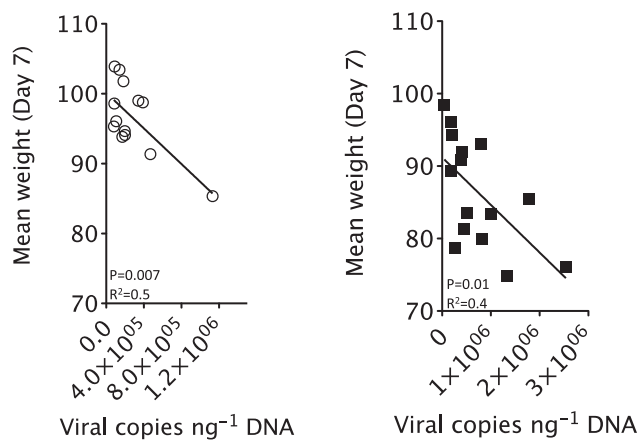

**Fig. S1.** Correlation between weight loss and viremia in C57BL/6 (T21<sup>+/+</sup>) (white circles) and knockout *tripartite-motif protein 21* (*Trim21*) C57BL/6 mice (T21<sup>-/-</sup>) mice (black squares).
